# Supplementary material for: Visible-light degradable polymer coated hollow mesoporous silica nanoparticles for controlled drug release and cell imaging
Source: Royal Society of Chemistry journal article supplement (doi:10.1039/c3tb20922a), 2013-01-01
Supplement: c3tb20922a.pdf [file c3tb20922a.pdf]

## **Visible-light degradable polymer coated hollow mesoporous silica nanoparticles for controlled drug release and cell imaging**

Shun Yang <sup>a</sup>, Najun Li\* <sup>a,b</sup>, Dongyun Chen <sup>a</sup>, Xiuxiu Qi <sup>a</sup>, Yujie Xu <sup>c</sup>, Ying Xu <sup>c</sup>, Qingfeng Xu <sup>a,b</sup>, Hua Li <sup>a,b</sup> and Jianmei Lu\* <sup>a,b</sup>

<sup>a</sup> Jiangsu Key Laboratory of Advanced Functional Polymer Design and Application, College of Chemistry, Chemical Engineering and Materials Science, Soochow University, Suzhou, 215123 China.

<sup>b</sup> State Key Laboratory of Treatments and Recycling for Organic Effluents by Adsorption in Petroleum and Chemical Industry, Suzhou, 215123 China.

<sup>c</sup> Medical College of Radiation Medicine and Protection, Soochow University, Suzhou, 215123, China

\* E-mail: linajun@suda.edu.cn, lujm@suda.edu.cn; Tel./Fax: +86 (0) 512-6588 0367.

### **Supplementary Information**

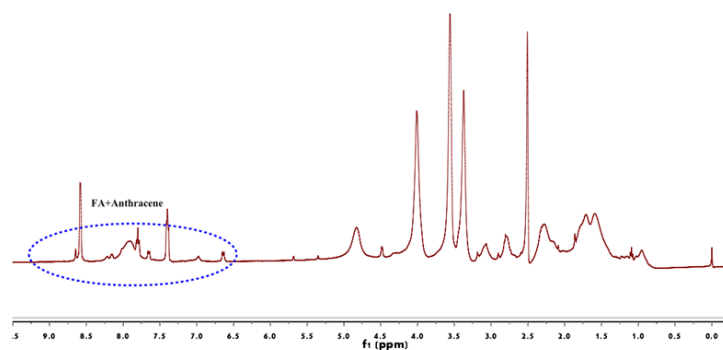

Fig. S1 <sup>1</sup>H NMR spectra of HAMAFA-*b*-MAPS

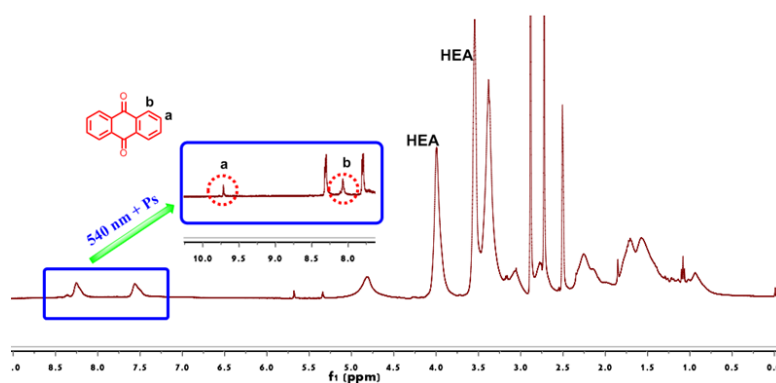

Fig. S2 <sup>1</sup>H NMR spectra of the photocleavage of HAMA-*b*-MAPS

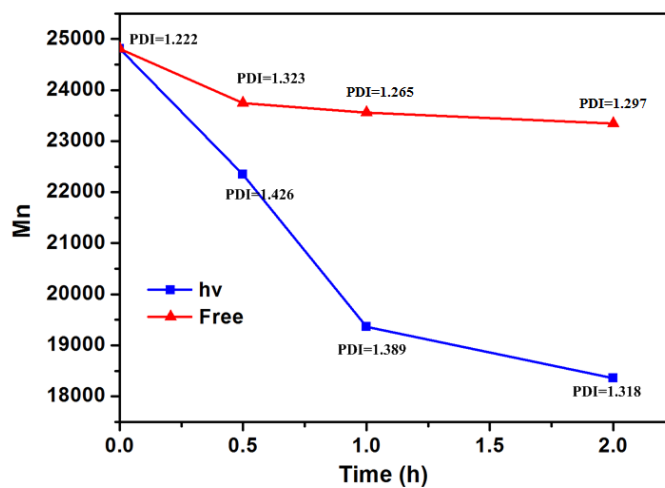

Fig. S3 GPC of the photocleavage of HAMA-*b*-MAPS

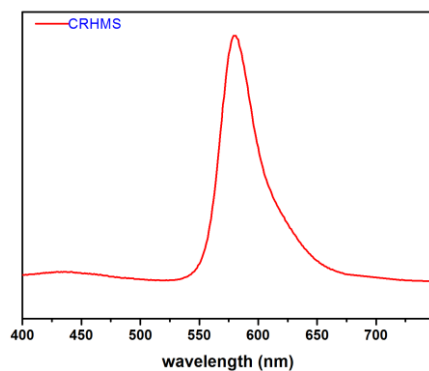

**Fig. S4** The fluorescence emission spectrum of CRHMS@HFMP

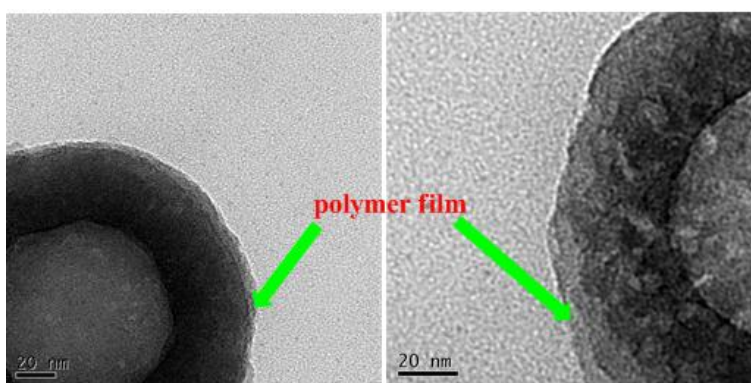

**Fig. S5** Enlarged TEM images of the nanocomposites

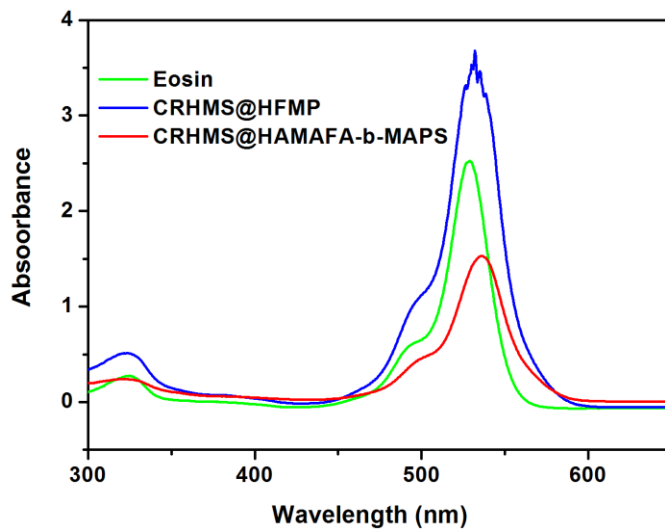

**Fig. S6** UV-Vis spectra of nanocomposites

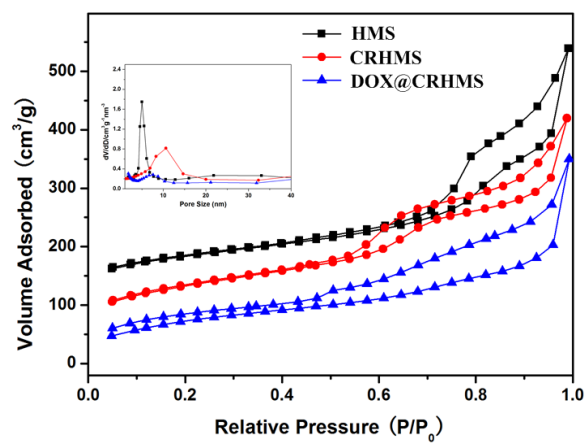

**Fig. S7** N<sub>2</sub> adsorption–desorption isotherm and the corresponding pore size distribution inset of HMS, CRHMS and DOX@CRHMS
